# Supplementary material
Source: PubMed Central journal article supplement (PMC5401792)
Supplement: NIHMS839802-supplement-2.pdf [file NIHMS839802-supplement-2.pdf]

**eTable2. Empirical prediction models for the measured plasma and erythrocyte EPA and DHA**

|                                                                       | NHS                   |                         |      |      |       | HPFS                                                                 |                         |      |      |      |       |                       |
|-----------------------------------------------------------------------|-----------------------|-------------------------|------|------|-------|----------------------------------------------------------------------|-------------------------|------|------|------|-------|-----------------------|
|                                                                       | Food (servings/d)     | Cohort <sup>‡</sup> , % | β    | SE   | p     | Food (servings/d)                                                    | Cohort <sup>§</sup> , % | β    | SE   | p    |       |                       |
| <b>EPA</b>                                                            |                       |                         |      |      |       |                                                                      |                         |      |      |      |       |                       |
| Erythrocyte <sup>¶</sup><br>(Mean ± SD)<br>(0.41 ± 0.16 %)<br>n=1,557 | Canned tuna           | 17.9                    | 0.23 | 0.07 | <.001 | Erythrocyte <sup>¶</sup><br>(Mean ± SD)<br>(0.46 ± 0.25%)<br>n=1,364 | Canned tuna             | 10.2 | 0.37 | 0.08 | <.001 |                       |
|                                                                       | Dark fish             | 38.2                    | 1.27 | 0.16 | <.001 |                                                                      | Dark fish               | 43.4 | 1.33 | 0.11 | <.001 |                       |
|                                                                       | Other fish            | 20.0                    | 0.23 | 0.08 | 0.003 |                                                                      | Other fish              | 13.8 | 0.74 | 0.11 | <.001 |                       |
|                                                                       | Shrimp and shellfish  | 8.2                     | 0.69 | 0.18 | <.001 |                                                                      |                         |      |      |      |       |                       |
|                                                                       | Chicken w/ skin       | 12.1                    | 0.17 | 0.07 | 0.01  |                                                                      |                         |      |      |      |       |                       |
|                                                                       | R <sup>2</sup> = 0.09 |                         |      |      |       |                                                                      |                         |      |      |      |       | R <sup>2</sup> = 0.19 |
| <hr/>                                                                 |                       |                         |      |      |       |                                                                      |                         |      |      |      |       |                       |
| Plasma <sup>¶</sup><br>(Mean ± SD)<br>(0.45 ± 0.23%)<br>n=1,353       | Canned tuna           | 17.9                    | 0.20 | 0.10 | 0.04  | Plasma <sup>¶</sup><br>(Mean ± SD)<br>(0.54 ± 0.37%)<br>n=1,321      | Canned tuna             | 10.2 | 0.48 | 0.10 | <.001 |                       |
|                                                                       | Dark fish             | 38.2                    | 1.13 | 0.22 | <.001 |                                                                      | Dark fish               | 43.4 | 1.21 | 0.14 | <.001 |                       |
|                                                                       | Other fish            | 20.0                    | 0.25 | 0.11 | 0.02  |                                                                      | Other fish              | 13.8 | 0.78 | 0.14 | <.001 |                       |
|                                                                       | Shrimp and shellfish  | 8.2                     | 0.66 | 0.25 | 0.009 |                                                                      |                         |      |      |      |       |                       |
|                                                                       | R <sup>2</sup> = 0.05 |                         |      |      |       |                                                                      |                         |      |      |      |       | R <sup>2</sup> = 0.14 |
|                                                                       | <hr/>                 |                         |      |      |       |                                                                      |                         |      |      |      |       |                       |
| <b>DHA</b>                                                            |                       |                         |      |      |       |                                                                      |                         |      |      |      |       |                       |
| Erythrocyte <sup>¶</sup><br>(Mean ± SD)<br>(3.29 ± 0.98%)<br>n=1,966  | Canned tuna           | 29.1                    | 0.40 | 0.05 | <.001 | Erythrocyte <sup>¶</sup><br>(Mean ± SD)<br>(3.32 ± 1.11%)<br>n=1,365 | Canned tuna             | 19.8 | 0.42 | 0.06 | <.001 |                       |
|                                                                       | Dark fish             | 22.3                    | 1.23 | 0.11 | <.001 |                                                                      | Dark fish               | 29.5 | 0.90 | 0.08 | <.001 |                       |
|                                                                       | Other fish            | 26.4                    | 0.40 | 0.06 | <.001 |                                                                      | Other fish              | 23.2 | 0.60 | 0.08 | <.001 |                       |
|                                                                       | Shrimp and shellfish  | 3.2                     | 0.34 | 0.13 | 0.007 |                                                                      | Chicken w/o skin        | 8.7  | 0.09 | 0.04 | 0.03  |                       |
|                                                                       | R <sup>2</sup> = 0.17 |                         |      |      |       |                                                                      |                         |      |      |      |       | R <sup>2</sup> = 0.25 |
|                                                                       | <hr/>                 |                         |      |      |       |                                                                      |                         |      |      |      |       |                       |
| Plasma <sup>¶</sup><br>(Mean ± SD)<br>(1.42 ± 0.58%)<br>n=1,766       | Canned tuna           | 29.1                    | 0.38 | 0.06 | <.001 | Plasma <sup>¶</sup><br>(Mean ± SD)<br>(1.37 ± 0.60%)<br>n=1,319      | Canned tuna             | 19.8 | 0.59 | 0.07 | <.001 |                       |
|                                                                       | Dark fish             | 22.3                    | 1.40 | 0.15 | <.001 |                                                                      | Dark fish               | 29.5 | 1.05 | 0.09 | <.001 |                       |
|                                                                       | Other fish            | 26.4                    | 0.46 | 0.07 | <.001 |                                                                      | Other fish              | 23.2 | 0.66 | 0.10 | <.001 |                       |
|                                                                       | Shrimp and shellfish  | 3.2                     | 0.46 | 0.17 | 0.007 |                                                                      |                         |      |      |      |       |                       |
|                                                                       | R <sup>2</sup> = 0.14 |                         |      |      |       |                                                                      |                         |      |      |      |       | R <sup>2</sup> = 0.24 |
|                                                                       | <hr/>                 |                         |      |      |       |                                                                      |                         |      |      |      |       |                       |

<sup>‡</sup> 1986-1990 average percent contribution to total intake in the NHS full cohort

<sup>§</sup> 1990-1994 average percent contribution to total intake in the HPFS full cohort

<sup>¶</sup> Mean level was expressed as the percentage of total fatty acids; biomarker concentrations were adjusted for age, BMI, pack-year of smoking, fasting status, case-control status, menopausal status and hormone use

<sup>¶</sup> Total calories were forced into all models
